# Supplementary material for: Temporal visual processing deficits in post concussion syndrome
Source: Springer Nature journal article supplement (doi:10.1038/s41598-025-24029-0), 2025-10-15

# SVQ Response Distribution by Question

Scoring = total sum/19 – number of not tried

**Response** 4 = Very much 3 = Quite a lot 2 = Somewhat 1 = Very slightly 0 = Not at all N = Not tried

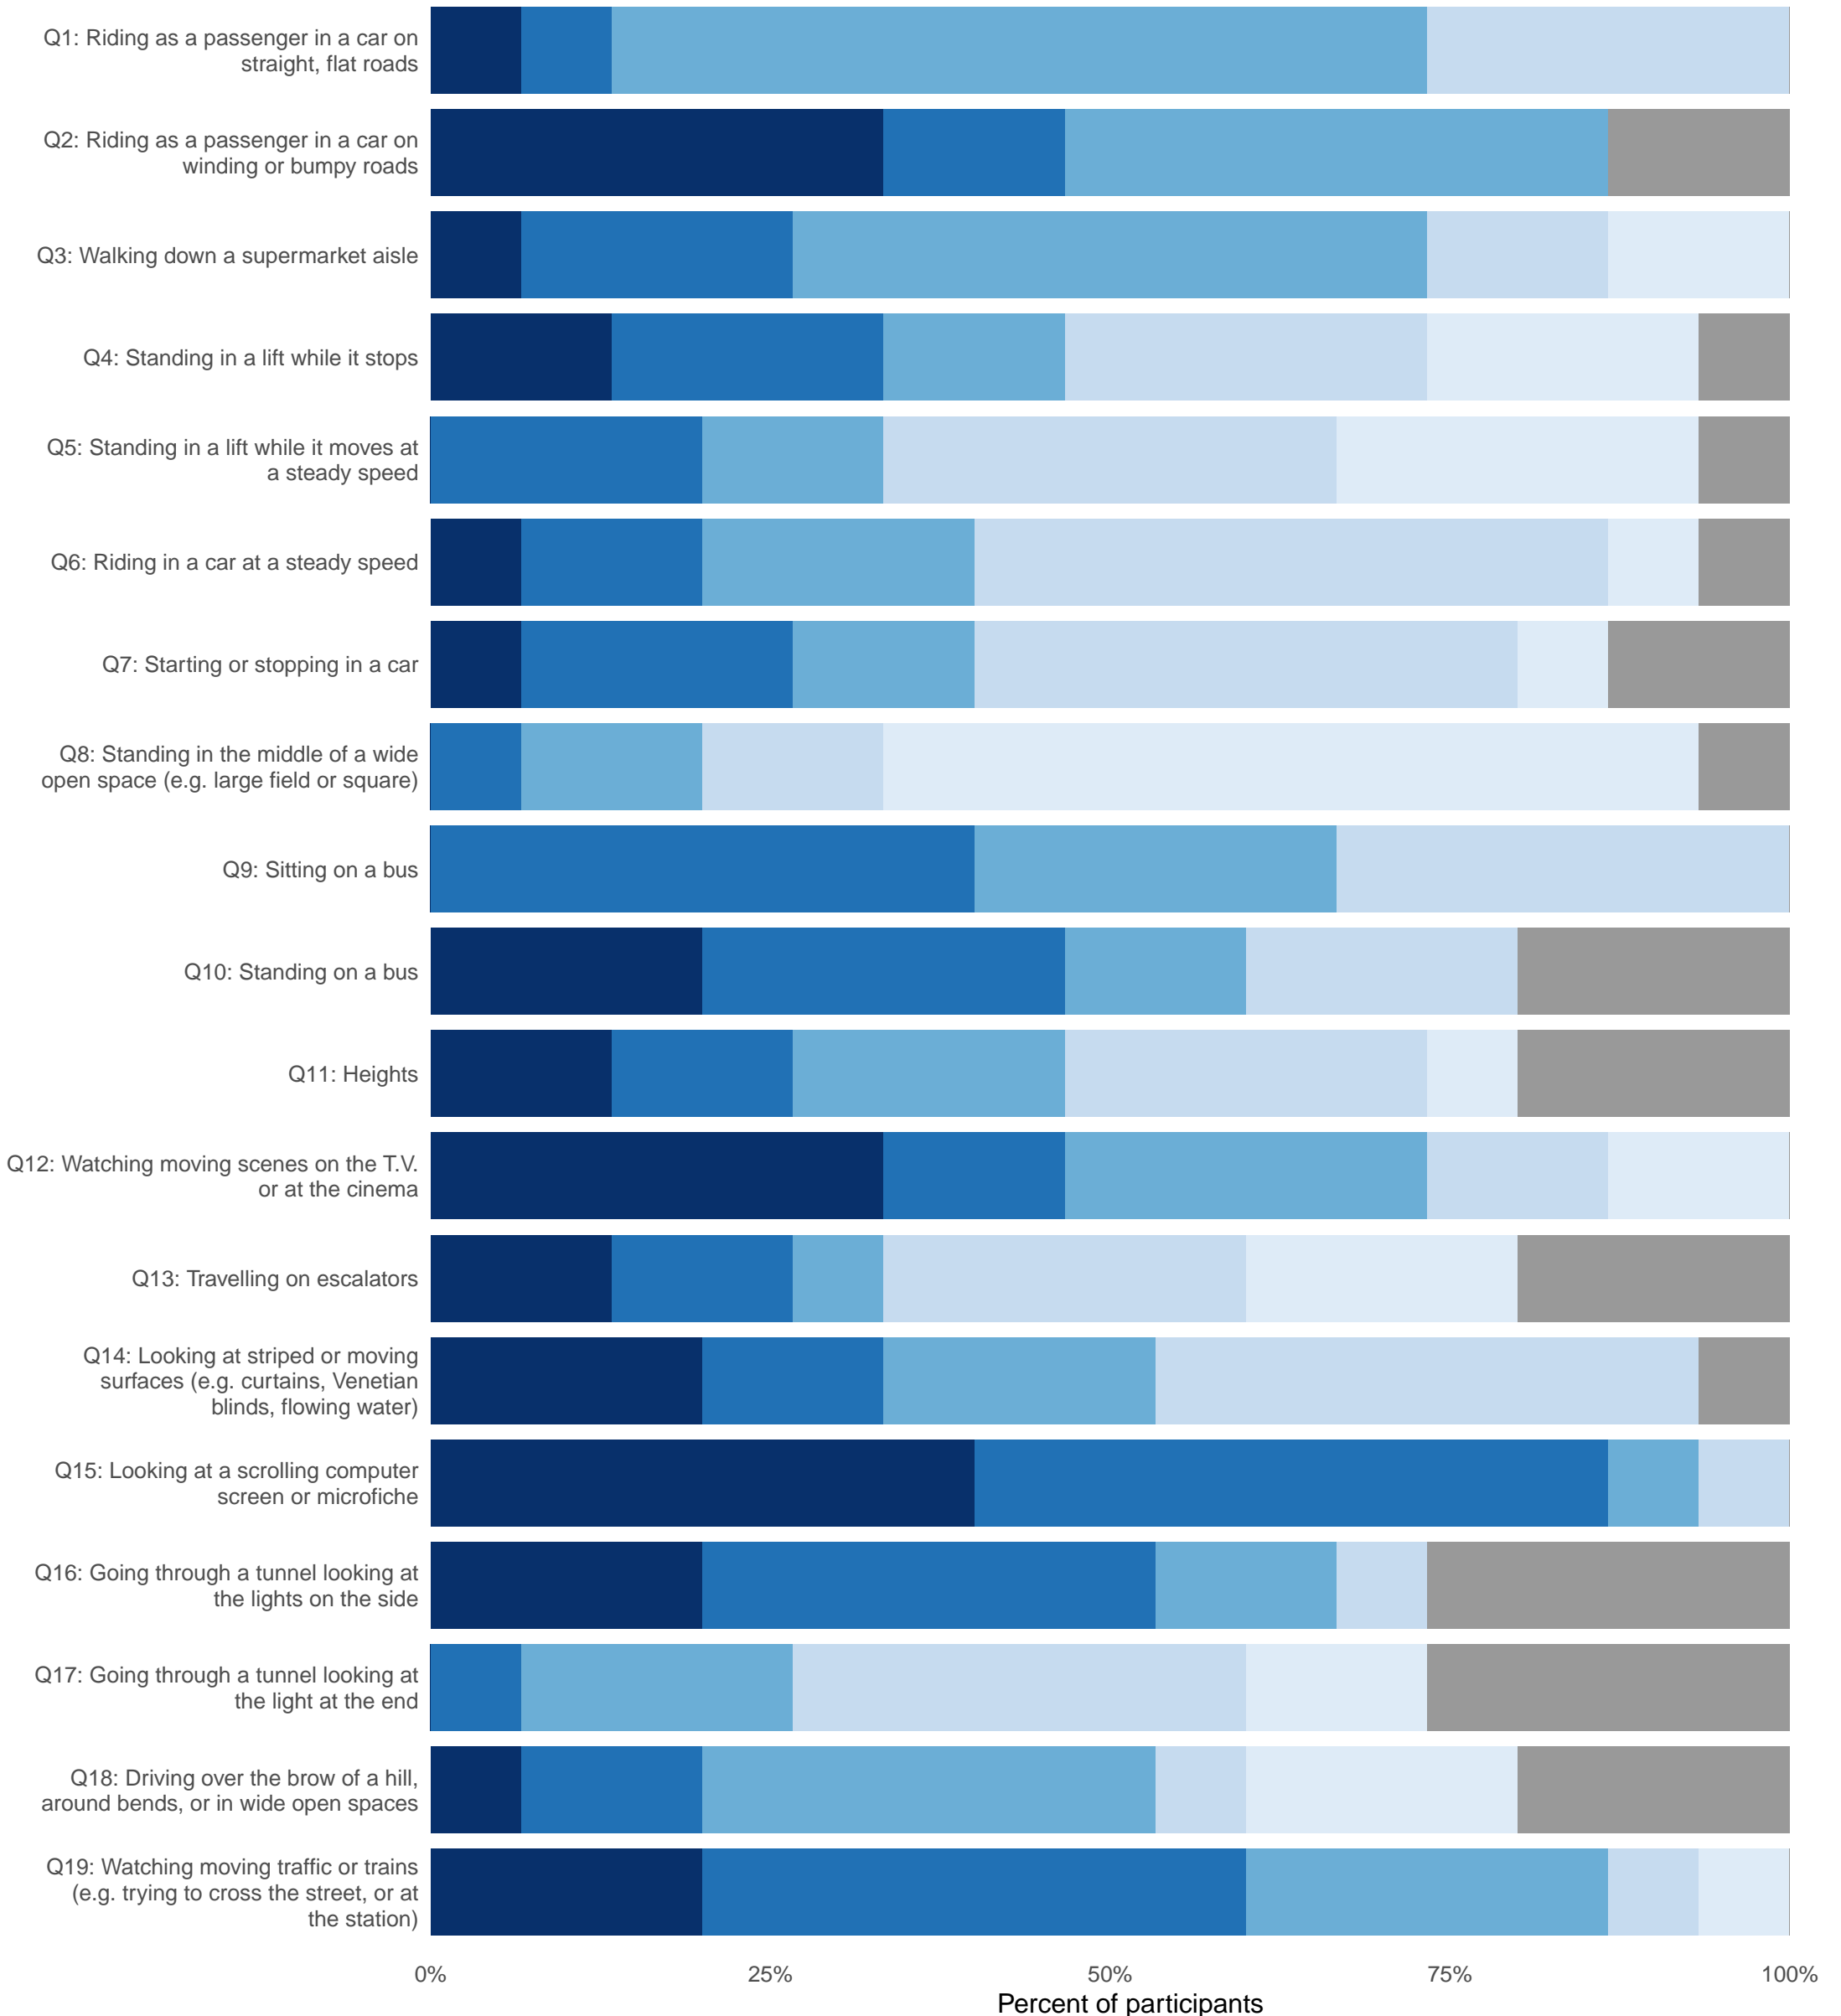

Supplement: MOESM1 [file 41598_2025_24029_MOESM1_ESM.pdf]
